# Supplementary material for: Grafting of synthetic mannose receptor-ligands onto onion vectors for human dendritic cells targetingElectronic supplementary information (ESI) available: full experimental details. See http://www.rsc.org/suppdata/cc/b2/b206980f/
Source: Royal Society of Chemistry journal article supplement (doi:10.1039/b206980f), 2002-09-25
Supplement: b206980f.doc [file b206980f.doc]

SUPPORTING INFORMATION

## Materials

Phosphatidylcholine (PC) from soya S100 was purchased from Lipoid, France ; 8 polyethoxy stearyl ester (Simulsol 2599 or Sim) from SEPPIC, France ; Rhodamine 6G-dihexadecylphosphatidylethanolamine (Rhd-DHPE) from Molecular Probes, Oregon, USA; Fluorescein isothiocyanate and quinic acid were purchased from Sigma, Saint-Quentin-Fallavier, France, PAL-PEG-PS resin was purchased from Applied biosystems, Warrington, UK, and amino acids were purchased from France Biochem, Meudon, France.

## General

Analytical reverse-phase high performance liquid chromatography (RP-HPLC), separations were performed on a Shimadzu LC-10A systems, on an Vydac C-18 (300 Å, 8 m, 4,6  250 mm) or a C3 Zorbax (300 Å, 5 m, 4.6  250 mm), columns at a flow rate of 1 mL.min-1 (monitoring and analysis), with detection at 215 nm, at 50°C. Gradient: 0-50% B over 60 min. Semi-preparative RP-HPLC separations were performed on a Shimadzu LC-4A systems, on an Nucleosil C-18 (300 Å, 8 m, 10  260 mm), column at a flow rate of 3 mL.min-1, with detection at 225 nm at 60°C. Solvent system A: 0.05% TFA in water; solvent system B: 0.05% TFA in 40% *i*PrOH-60% water. TOF-PDMS spectra were recorded upon a Bio-Ion 20 Plasma Desorption Mass Spectrometer (Uppsala Sweden), and MALDI-TOF-MS spectra were recorded on a Finnigan Vision 2000 Mass Spectrometer on a -cyano-4-hydroxycinnamic acid matrix. 1H and 13C NMR spectra were recorded in H2O-D2O 90:10 on Bruker DRX 300 spectrometer. Chemical shifts are given in ppm and referenced to internal 3-(trimethylsilyl) [2,2,3,3-d4] propionic acid, sodium salt (TMSP).

# Synthesis of compound 6

Solid quinide(1.81 g, 10.4 mmol) was added in one portion to a flask containing ethylene diamine (10.42 mL, 15 equiv.) at room temperature. The reaction mixture was stirred at 40°C for 1 hour then diluted with heptane and concentrated under reduced pressure (5 times). The residue was then dried under vacuum over P2O5 for 5 hours to give quinic (2-aminoethyl)amide as a glassy solid (quantitative).

H 1.85 (1 H, dd, *J* 13.4 and18.0 Hz), 1.91-2.02 (3 H, m), 2.69 (2 H, t, *J* 6.1 Hz), 3.22 (2 H, t, *J* 6.1 Hz), 3.46 (1 H, dd, *J* 3.1 and 9.6 Hz), 3.99 (1 H, m), 4.14 (1 H, dd, *J* 3.1 and 6.3 Hz); C 177.7, 77.2, 75.5, 70.8, 66.8, 41.9, 40.7, 40.3, 37.5; *m/z* (TOF-PDMS) 256.4 (M+Na)+, 234.6 (M+H)+.

Quinic (2-aminoethyl)amide (1.33 g, 5.68 mmol) was introduced in a 1:1 mixture of DMF-MeOH (20 mL) containing Et3N (1.58 mL, 2 equiv.) and heated at 50°C. Solid diglycolic anhydride (590 mg, 0.9 equiv.) was then added in several portions and the mixture was further stirred at 50°C for 4 hours. The solvent was evaporated under reduced pressure and the residue dissolved in methanol and precipitated upon addition of CHCl3. The hygroscopic residue was filtered and purified on Dowex 50x8-200 resin (HCOO- form), using aqueous HCOOH 0.38M as eluent. Compound **6** (1.19 g, 60%) was obtained after freeze-drying as a hygroscopic glassy solid.

H 1.73-2.02 (4 H, m), 3.24-3.29 (4 H, m), 3.41 (1 H, dd, *J* 3.1 and *J* 9.6 Hz), 3.80-3.98 (5 H, m), 4.09 (1 H, dd, *J* 3.1 and 6.3 Hz), 8.34 and 8.22 (2 H, 2 br s); C 178.1, 177.6, 173.2, 77.1, 75.5, 71.0, 70.7, 69.8, 66.7, 40.6, 39.1, 38.7, 36.9; *m/z* (TOF-PDMS) 360.5 (M+Na)+.

## Solid-Phase Peptide synthesis of compound 2

Compound **2** was synthesized on a PAL-PEG-PS resin using the Fmoc/*tert*-Butyl strategy at a 0.1 mmole scale. Fmoc-L-Lys(Mtt)-OH (2 equiv.) was first anchored manually to the resin *via* HBTU-HOBt-DIEA (2:2:6 equiv.) activation in DMF for 40 min. The coupling was followed by a capping with Ac2O-DIPEA-DMF 3:0.3:96.7 for 10 min and washing with DMF (3  2 min), and CH2Cl2 (3  2 min). The Mtt group of the -NH2 of the lysine residue was removed by treatment with a solution of 1% TFA in CH2Cl2 (7 times). Monitoring of the deprotection was realized as described in reference 12. [*N*,*N’*-tri(*tert*-butyloxycarbonyl)hydrazino]acetic acid (1.2 equiv.) was then introduced onto the peptidyl resin swollen in DMF *via* HBTU-HOBt-DIEA activation (1.2/1.2/3.6 equiv.). Charge of the resin, determined by fluorenyl UV monitoring, was found equal to 0.162 mmol.g-1. Rest of the synthesis was achieved automatically on a continuous flow synthesizer (Pioneer PerSeptive Biosystems), using HBTU-HOBt-DIEA activation in DMF. Side-chain protecting group of Fmoc-L-Lys-OH was 9-fluorenylmethyloxycarbonyl; side-chain protecting group of Fmoc-L-Gln-OH was a trityl group. Each coupling was followed by a capping with Ac2O-DIEA-DMF 3:0.3:96.7. Cleavage of the Fmoc protecting groups was achieved by treatment with 20% piperidine in DMF. Single and double coupling using an excess of 10 or 5 was used for coupling the first lysine and then the second lysine and the glutamine residues, respectively.

Following the last deprotection step, the peptidyl resin swollen in DMF was reacted with compound **8** (0.48 mol, 1.2 equiv./NH2) preactivated for 1 min with HBTU-HOBt-DIEA (1.2:1.2:3.6 equiv./NH2) in DMF for 40 min. Following filtration, the peptidyl resin was washed with DMF (3  2 min), and CH2Cl2 (3  2 min). (twice). Completion of the reaction was monitored by the TNBS test [W. S. Hancock and J. E. Battersby, *Anal. Biochem.*, 1976, *71*, 260].

The resin was washed with diethyl ether and dried. The tree was then cleaved from the resin and deprotected by TFA-H2O-*i*Pr3SiH 95:2.5:2.5 (15 mL), for 2 h at RT, precipitated in cold diethylether, centrifugated, washed with cold diethyl ether, dissolved in H2O and freeze-dried to give 128.5 mg of a crude mixture.

To a suspension of the crude tree in distilled (over Mg) MeOH (30 mL) was added 181 L of a 2M solution of sodium methoxide in MeOH (pH 8-9, paper). The reaction mixture was stirred for 30 min at RT, quenched by addition of 5% aqueous AcOH (50 L) and concentrated under reduced pressure (this step was performed to cleave ester functions formed between the carboxylic acid group of **6** and hydroxy groups of the quinoyl residues: reaction of core **5** with diglycolic anhydride followed by coupling with quinic (2-aminoethyl)amide would probably limit the occurence of these side-products in an optimised synthesis). Compound **2** (38 mg, 15%) was obtained as a white powder after RP-HPLC purification [gradient: 100:0 to 80:20 (A/B), 50 min], followed by freeze-drying; H 1.24-1.45 (8 H, m, 8 Lys -H), 1.47-1.62 (8 H, m, 8 Lys -H), 1.62-1.85 (8 H, m, 8 Lys -H), 1.85-2.22 (24 H, 8 Gln -H, 8 H-2 quinoyl and 8 H-6 quinoyl), 2.32-2.44 (8 H, m, 8 Gln -H), 3.09-3.27 (8 H, m, 8 Lys -H), 3.41 (16 H, br s, 8 CH2), 3.53 (4 H, br dd, *J* 3.1 and 9.5 Hz, 4 H-4 quinoyl), 3.76 (2 H, s, CH2), 4.03 (4 H, m, 4 H-5 quinoyl), 4.13 and 4.17 (2 x 8 H, 2 x s, 2 x 4 CH2), 4.18-4.24 (4 H, m, 4 H-5 quinoyl), 4.25-4.42 (8 H, m, 4 Lys -H and 4 Gln -H), 6.89 and 7.58 (2 x 4 H, 2 x br s, 4 Gln -NH2), 7.09 and 7.60 (2 x 1 H, 2 x s, Lys NH2), 8.08 (1 H, t, *J* 5.5 Hz, Lys NH), 8.15 (1 H, t, *J* 5.5 Hz, Lys NH), 8.49-8.20 (18 H, 4 Lys NH, 2 Lys NH, 4 Gln NH and 8 NH); *m/z* (positive MALDI-TOF-MS) 2481.7 (M+K)+, 2465.8 (M+Na)+, 2443.8 (M+H)+.

# Preparation of onion vectors and chemoselective ligation

Two sets of fluorescent onion vectors were prepared by mixing ethanolic solutions of PC /Sim/Rhd-DHPE (70/30/0.25 by weight) (control) and PC/Sim/**1**/Rhd-DHPE (60/30/10/0.25 by weight) (aldehyde). Typically, 10 mg of each lipid mixture are prepared. Pure water was added in excess and the resulting suspension was lyophilized. The dry lipids were hydrated with pure water (weight ratio lipids/water = 65/35). After a few hours incubation in the dark, the lipid paste were sheared in a cone shaped microtube by manual rotation of a closely fitted cone pestle to get Ø200 nm vesicles, immediately suspended in excess water so as to obtain a lipid paste/water ratio of 1/100 by weight. A 170 µM aqueous solution of Qui4-NH-NH2 in 10 mM sodium acetate/acetic acid pH 5 buffer was prepared. Equal volumes of vesicles suspensions and Qui4-NH-NH2 solution (2.1 equiv. since 16% of the total lipids belong to the outer lipid monolayer), reacted 16 h at 37°C. A centrifugation (20,000g, 30 min, 4°C), and two further washing/centrifugation steps with the above mentioned buffer permitted the recovery and the RP-HPLC quantification of the unreacted Qui4-NH-NH2 in comparison to the starting material [C3 Zorbax column, gradient: 100:0 to 0:100 (A/B), 30 min].

**5 µL of vesicles resuspended in water are destroyed by 10 µL of ethanol before a MALDI-TOF MS analysis:**

| Observed peak *m/z*, *m/z*>1100 (molecular form)a | | | | Identified compounds (exact mass) |
| --- | --- | --- | --- | --- |
| Control OV | Control OV + **2** | Aldehyde OV | Aldehyde OV + **2** |
| none | - | - | 3719.8 [**7**+Na]+ | **7** (3696.7) |
| - | 1296.0  [**1**+Na]+ | 1296.0  [**1** +Na]+ | **1** (1272.5) |
| 2443.3 [**2** +H]+  2465.2 [**2** +Na]+ | - | 2465.2  [**2** +Na]+ | **2** (2442.2) |
| 2435.2 [**Qui4**H +Na]+  2450.2 [**Qui4-**NH2+Na]+  4875  [**Qui4-**N2H2-**Qui4**+Na]+ | - | 2435.2  [**Qui4**H +Na]+  4875  [**Qui4-**N2H2-**Qui4**+Na]+ | Degradation products of **2**:  **Qui4-**H (2412.2)  **Qui4-**NH2 (2427.2)  **Qui4-**NHN=**Qui4** (4852.3) |
| - | - | 2449.2 [**Qui4**NH·+Na]+ | Fragmentation products of  **7**:  **Qui4-**NH· (2426.2) |

Table: MALDI-TOF analysis of supernatants after ligation of control of aldehyde onion vectors (OV) with a 2.1 fold excess of hydrazine **2**. Products of the fragmentation of hydrazines or hydrazones were observed as the results of NH-NH and CO-CH=N bond breaking.

a  The major lipid components of the onion vectors appeared in the range *m/z* = 657 to 1100.

**Uptake of decorated aldehyde onion vectors by human dendritic cells**

To quickly assess the accessibility and the functionality of the quinoylated trees grafted on the surface of the onions, we elected to study their uptake by human dendritic cells using confocal microscopy.

First of all, we checked that Qui4-NHNH2 was an effective ligand of the mannose receptor by flow cytometry. This experiment required the fluorescein-labelling of Qui4-NHNH2

*Labelling of compound* ***2***

Compound **2** (1.07 mg, 4.54 mol) was dissolved in DMF (400 L). To this solution were added fluorescein isothiocyanate (0.25 mg, 1.5 equiv.) and DIPEA (0.29 L, 4 equiv.). After 10 min, the reaction mixture was diluted with water, frozen and lyophilised. FITC-labelled tetraquinoylated tree **Qui4-**Fluor (1 mg, 78%) was obtained as a yellow powder after RP-HPLC purification (gradient: 100:0 to 70:30 (A/B), 80 min); ; *m/z* (positive MALDI-TOF-MS) 2855.5 (M+Na)+.

*Culture of Human Dendritic Cells from Peripheral Blood.*

Dendritic cellswere generated from Buffycoats provided by the EFS (Etablissement Français du Sang Nord-Pas-de Calais, Lille, France) according to ref 7 (C. Grandjean *et al*. *ChemBioChem*, 2001, **2**, 747).

Briefly, peripheral blood mononuclear cells (PBMCs), were obtained by Ficoll Paque (Pharmacia, Uppsala, Sweden) density gradient centrifugation and re-suspended in cell culture medium consisting of RPMI 1640 (Gibco, Courbevoie, France) supplemented with 5  10-5 M -mercaptoethanol (Merck, Darmstadt, Germany), 2 mM L-glutamine (Merck), 1 mM sodium pyruvate (Gibco), 10% heat-inactivated feotal calf serum (Gibco) and antibiotics: 50 g/mL gentamycin (Gibco) at 37°C in a 5% CO2 atmosphere. Cells were allowed to adhere to cell culture dishes (100 mm diameter, 8-12  107 cells/plaque) for 3-4 h at 37°C in an humidified CO2 incubator. After removal of the non adherent cells, the adherent cells were re-suspended at 1  106 cells/mL and cultured for 6-8 days in medium supplemented with cytokines: GM-CSF (800 U/mL) (Pepro Tech Inc., Rocky Hill, USA) and IL-4 (1000 U/mL) (Pepro Tech Inc.) in 24-well tissue culture plates.

# *Flow Cytometric Analysis.*

Cell Surface Antigen Detection

After several days of culture, cells were harvested and washed in PBS (Gibco) containing 0.03 mg/mL BSA (bovine serum albumin, Sigma Immunochemicals, St. Louis, USA). Cells were then incubated for 30 min on ice with following monoclonal antibodies (MAb): phyco-erythrine (PE)-conjugated anti-CD11c or purified non-blocking anti-mannose receptor (clone 19.2) (Pharmingen, San Diego, CA, USA). After incubation cells were washed and re-suspended in PBS. Mannose receptor expression was assessed with a goat anti-mouse IgG conjugated to Alexa 488 as secondary antibody (Molecular Probes, Leiden, The Netherlands). The cell-associated fluorescence was further analysed using a flow cytometer Epics XL-MCL (Coulter Corporation, Miami, USA).

Mannose receptor uptake of **Qui4-**Fluor

Cells were harvested after 5-8 days of culture and washed in PBS. They were first preincubated for 10 min at 37°C, then pulsed for 20 min at 37°C with **Qui4-**Fluor, mannoside construct or Man4-Fluor (positive control), and galactoside construct or Gal4-Fluor (negative control) (see ref. 7), at a 10 molar concentration, washed three times with cold PBS and then fixed for 20 min in paraformaldehyde 1%.

Cell-associated fluorescence was further analysed using the FACScan described above and reported in the following figure. In this experiment, non-specific uptake, due to endocytosis, was measured using cluster galactosides, Gal4-Fluor. Otherwise, mannose receptor-mediated uptake of Qui4-NHNH2 appeared very similar to the one of the positive control, probing effective recognition of the construct before its grafting on the onion vectors. The capture specificity was further confirmed by competitive inhibition assay using mannan, a bacterial polysaccharide known to bind with high affinity to the mannose receptor (data not shown).

(a) MFI stands for mean fluorescence intensity. (The results shown are representative of at least 3 independent experiments.)

*Confocal microscopy*

We used confocal microscopy to quickly assess full availability and functionality of the tetravalent glycomimetic clusters displayed at the surface of the spherulites.

Human dendritic cells were prepared as described above. They were first incubated 10min at 37°C, then pulsed for 5min or 1h at 37°C with aldehyde onion vectors, preincubated with or without Qui4-NHNH2 **2**, as described above, and then they were rapidly washed 2 times with cold PBS and fixed with PBS containing 4% paraformaldehyde, 0.1 mM CaCl2, 0.1 mM MgCl2 and 4% sucrose for 45 min at 4°C. Cells were washed in PBS and resuspended in a 50 mM of NH4Cl medium to stop the fixation reaction, and after 10 min at room temperature, cells were washed three times in PBS. Fixed cells were placed on glass coverslips, permeabilized and blocked for 10 min at room temperature in permeabilizing buffer (PBS containing 1 mg/mL BSA and 0.05% saponin). Then cells were incubated for 30 min at 37°C with a monoclonal anti-mannose receptor antibody [Mouse anti-human clone 19.2, Pharmingen, 1/200 dilution, (5 mg/mL), 30min, 37°C] then with a anti-IgG antibody coupled to AlexaFluor488 [Goat anti-mouse, Molecular Probes, 1/500 dilution, (1 mg/mL), 30min, 37°]. Slides were mounted using Vectaschield (Vector Laboratories, Compiègne, France). Fluorescence-stained slides were examined under a Leica TCS NT laser scanning confocal microscope (Leica, Heidelberg, Germany) comprising a krypton/argon laser at 488 and 568 nm excitation wavelength. Simultaneous double channel recording was performed. Frame scanning was performed at 1000 magnification and a single optical section was collected per field.
